# Supplementary material
Source: ML conference proceedings conference paper supplement (https://proceedings.mlr.press/v84/bagaria18a.html)
Supplement: Supplementary file [file bagaria18a-supp.pdf]

## Supplementary Materials

### 1 The Empirical Results for the 20k Datasets of single cell RNA-seq and Netflix users

On the 20,000 cell dataset, we note that **Med-dit** stopped within 140 distance evaluations per arm in each of the 1000 trials (with 80 distance evaluations per arm on average) and never returned the wrong answer. **RAND** needs around 700 distance evaluations per point to obtain 2% error rate.

On the 20,000 user dataset, we note that **Med-dit** stopped within 600 distance evaluations per arm in each of the 1000 trials (with 500 distance evaluations per arm on average) and never returned the wrong answer. **RAND** needs around 4500 distance evaluations per point to obtain 2% error rate.

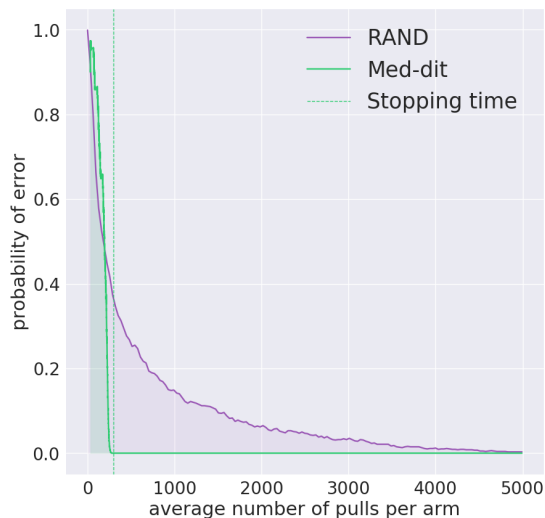

Figure 9: Small Netflix-prize dataset: We computed the true medoid of the data-set by brute force. The  $y$ -axis shows the probability that the estimated medoid does *not* correspond to the true medoid as a function of the number of pulls per arm. We note that **Med-dit** has a stopping condition while **RAND** does not. However we ignore the stopping condition for **Med-dit** here. **Med-dit** stops after 500 distance evaluations per point without failing in any of the 1000 trials, while **RAND** takes around 4500 distance evaluations to reach a 2% probability of error.

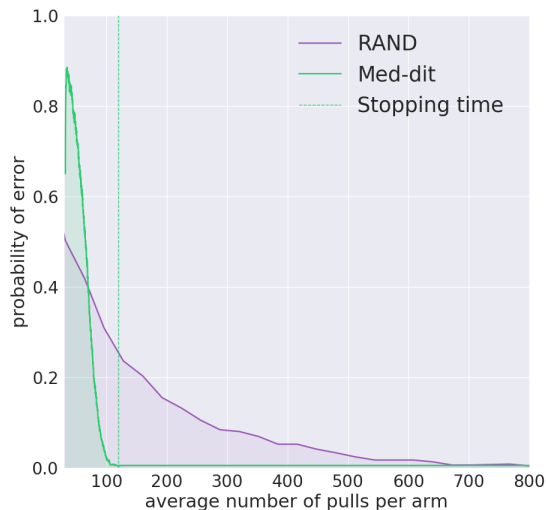

Figure 8: Small single cell dataset: We computed the true medoid of the dataset by brute force. The  $y$ -axis shows the probability that the estimated medoid does *not* correspond to the true medoid as a function of the number of pulls per arm. We note that **Med-dit** has a stopping condition while **RAND** does not. However we ignore the stopping condition for **Med-dit** here. **Med-dit** stops after 80 distance evaluations per point without failing in any of the 1000 trials, while **RAND** takes around 650 distance evaluations to reach a 2% probability of error.

## 2 The $O(n \log n)$ Distance Evaluations Under Gaussian Prior

We assume that the mean distances of each point  $\mu_i$  are i.i.d. samples of  $N(\gamma, 1)$ . We note that this implies that  $\Delta_i$ ,  $1 \leq i \leq n$  are  $n$  i.i.d. random variables. Let  $\Delta$  be a random variable with the same law as  $\Delta_i$ .

From the concentration of the minimum of  $n$  gaussians, we have that

$$\min_i \mu_i + \sqrt{2 \log n} \xrightarrow{p} \gamma.$$

This gives us that

$$\Delta - \sqrt{2 \log n} \xrightarrow{d} \mathcal{N}(0, 1).$$

We note that by Eq (2), we have that the expected number of distance evaluations  $M$  is of the order of

$$\mathbb{E}[M] \leq n \mathbb{E} \left[ \frac{\log n}{\Delta^2} \wedge n \right],$$

where the expectation is taken with respect to the randomness of  $\Delta$ .

To show this, it is enough to show that,

$$\mathbb{E} \left[ \frac{\log n}{\Delta^2} \wedge n \right] \leq C \log n,$$

for some constant  $C$ .

To compute that for this prior, we divide the real line into three intervals, namely

- $\left(-\infty, \sqrt{\frac{\log n}{n}}\right]$ ,
- $\left(\sqrt{\frac{\log n}{n}}, c\sqrt{\log n}\right)$ ,
- $[c\sqrt{\log n}, \infty)$ ,

and compute the expectation on these three ranges. We note that for if  $\Delta \in (-\infty, \sqrt{\frac{\log n}{n}}]$ , while for  $\Delta \in (\sqrt{\frac{\log n}{n}}, \infty]$ ,  $\frac{\log n}{\Delta^2} \leq n$ . Thus we have that,

$$\begin{aligned} \mathbb{E} \left[ \frac{\log n}{\Delta^2} \wedge n \right] &\leq \overbrace{\mathbb{E} \left[ n \mathbb{I} \left( \Delta \leq \sqrt{\frac{\log n}{n}} \right) \right]}^{\mathbf{I}} + \lim_{\delta, \epsilon \rightarrow 0} \overbrace{\mathbb{E} \left[ \frac{\log n}{\Delta^2} \mathbb{I} \left( \sqrt{\frac{\log n}{n^{(1-\epsilon)}}} \leq \Delta \leq c \frac{\sqrt{\log n}}{n^\delta} \right) \right]}^{\mathbf{II}} \\ &\quad + \underbrace{\mathbb{E} \left[ \frac{\log n}{\Delta^2} \mathbb{I} \left( \Delta \geq c\sqrt{\log n} \right) \right]}_{\mathbf{III}}, \end{aligned}$$

where we use the Bounded Convergence Theorem to establish **II**.

We next show that all three terms in the above equation are of  $O(\log n)$ . We first show the easy cases of **I** and **III** and then proceed to **II**.

- To establish that **I** is  $O(\log n)$ , we start by defining,  $q_1 = P[\Delta < \frac{\sqrt{\log n}}{n}]$

$$\mathbb{E} \left[ n \mathbb{I} \left( \Delta \leq \frac{\sqrt{\log n}}{n} \right) \right] = n q_1.$$

Further note that,

$$\begin{aligned} q_1 &\leq \exp\left(-\frac{1}{2}\left(\sqrt{2\log n} - \sqrt{\frac{\log n}{n}}\right)^2\right), \\ &= \left(\frac{1}{n}\right)^{\left(1 - \frac{1}{\sqrt{2n}}\right)^2}. \end{aligned}$$

Thus

$$\begin{aligned} \frac{q_1 n}{\log n} &\leq \frac{n^{1 - \left(1 - \frac{1}{\sqrt{2n}}\right)^2}}{\log n}, \\ &\leq \exp\left(\left(\sqrt{\frac{2}{n}}(1 + o(1))\log n - \log \log n\right)\right), \\ &= o(1). \end{aligned}$$

- To establish that **III** is  $O(\log n)$ , we note that,

$$\begin{aligned} \mathbb{E}\left[\frac{\log n}{\Delta^2} \mathbb{I}\left(\Delta \geq c\sqrt{\log n}\right)\right] &\leq \frac{1}{c^2} P(\Delta \geq c\sqrt{\log n}), \\ &\leq \frac{1}{c^2}, \\ &= \Theta(1). \end{aligned}$$

- Finally to establish that **II** is  $O(\log n)$ , we note that,

$$\begin{aligned} \lim_{\delta, \epsilon \rightarrow 0} \mathbb{E}\left[\frac{\log n}{\Delta^2} \mathbb{I}\left(\sqrt{\frac{\log n}{n^{(1-\epsilon)}}} \leq \Delta \leq c\frac{\sqrt{\log n}}{n^\delta}\right)\right] &\leq \lim_{\delta, \epsilon \rightarrow 0} n^{2-\epsilon} P\left(\Delta \leq c\frac{\sqrt{\log n}}{n^\delta}\right), \\ &\leq \lim_{\delta, \epsilon \rightarrow 0} n^{1-\epsilon} \exp\left(-\frac{1}{2}\left(\sqrt{2\log n} - \sqrt{\log n \frac{c}{n^\delta}}\right)^2\right), \\ &= \lim_{\delta, \epsilon \rightarrow 0} n^{1-\epsilon} \left(\frac{1}{n}\right)^{\left(1 - \frac{c}{\sqrt{2n^\delta}}\right)^2}, \\ &= \lim_{\delta, \epsilon \rightarrow 0} n^{1-\epsilon - \left(1 - \frac{c}{\sqrt{2n^\delta}}\right)^2}, \\ &= \lim_{\delta, \epsilon \rightarrow 0} n^{-\epsilon + \frac{\sqrt{2}c}{n^\delta} - \frac{c^2}{2n^{2\delta}}}. \end{aligned}$$

Letting  $\delta$  to go to 0 faster than  $\epsilon$ , we see that,

$$\lim_{\delta, \epsilon \rightarrow 0} \mathbb{E}\left[\frac{\log n}{\Delta^2} \mathbb{I}\left(\sqrt{\frac{\log n}{n^{(1-\epsilon)}}} \leq \Delta \leq c\frac{\sqrt{\log n}}{n^\delta}\right)\right] \leq O(\log n).$$

This gives us that under this model, we have that under this model,

$$\mathbb{E}[M] \leq O(n \log n).$$

### 3 Proof of Theorem 1

Let  $M$  be the total number of distance evaluations when the algorithm stops. As defined above, let  $T_i(t)$  be the number of distance evaluations of point  $i$  up to time  $t$ .

We first assume that  $[\hat{\mu}_i(t) - C_i(t), \hat{\mu}_i(t) + C_i(t)]$  are true  $(1 - \frac{2}{n^3})$ -confidence interval (Recall that  $\delta = \frac{2}{n^3}$ ) and show the result. Then we prove this statement.

Let  $i^*$  be the true medoid. We note that if we choose to update arm  $i \neq i^*$  at time  $t$ , then we have

$$\hat{\mu}_i(t) - C_i(t) \leq \hat{\mu}_{i^*}(t) - C_{i^*}(t).$$

For this to occur, at least one of the following three events must occur:

$$\begin{aligned} \mathcal{E}_1 &= \{\hat{\mu}_{i^*}(t) \geq \mu_{i^*}(t) + C_{i^*}(t)\}, \\ \mathcal{E}_2 &= \{\hat{\mu}_i(t) \leq \mu_i(t) - C_i(t)\}, \\ \mathcal{E}_3 &= \{\Delta_i = \mu_i - \mu_{i^*} \leq 2C_i(t)\}. \end{aligned}$$

To see this, note that if none of  $\mathcal{E}_1, \mathcal{E}_2, \mathcal{E}_3$  occur, we have

$$\hat{\mu}_i(t) - C_i(t) \stackrel{(a)}{>} \mu_i - 2C_i(t) \stackrel{(b)}{>} \mu_1 \stackrel{(c)}{>} \hat{\mu}_1 - C_1(t),$$

where (a), (b), and (c) follow because  $\mathcal{E}_2, \mathcal{E}_3$ , and  $\mathcal{E}_1$  do not hold respectively.

We note that as we compute  $(1 - \frac{2}{n^3})$ -confidence intervals at most  $n$  times for each point. Thus we have at most  $n^2$  computations of  $(1 - \frac{2}{n^3})$ -confidence intervals in total.

Thus  $\mathcal{E}_1$  and  $\mathcal{E}_2$  do not occur during any iteration with probability  $(1 - \frac{2}{n})$ , because

$$\text{w.p. } (1 - \frac{2}{n}) : |\mu_i - \hat{\mu}_i(t)| \leq C_i(t), \quad \forall i \in [n], \quad \forall t. \quad (3)$$

This also implies that with probability  $1 - \Theta(\frac{1}{n})$  the algorithm does not stop unless the event  $\mathcal{E}_3$ , a deterministic condition stops occurring.

Let  $\zeta_i$  be the iteration of the algorithm when it evaluates a distance to point  $i$  for the last time. From the previous discussion, we have that the algorithm stops evaluating distances to points  $i$  when the following holds.

$$\begin{aligned} C_i(\zeta_i) \leq \frac{\Delta_i}{2} &\implies \frac{\Delta_i}{2} \geq \sqrt{\frac{2\sigma^2 \log n^3}{T_i(\zeta_i)}} \text{ or } C_i(\zeta_i) = 0, \\ &\implies T_i(\zeta_i) \geq \frac{24\sigma^2}{\Delta_i^2} \log n \text{ or } T_i(\zeta_i) \geq 2n. \end{aligned}$$

Thus with probability  $(1 - o(1))$ , the algorithm returns  $i^*$  as the medoid with at most  $M$  distance evaluations, where

$$M \leq \sum_{i \in [n]} T_i(\zeta_i) \leq \sum_{i \in [n]} \left( \frac{24\sigma^2}{\Delta_i^2} \log n \wedge 2n \right).$$

To complete the proof, we next show that  $[\hat{\mu}_i(t) - C_i(t), \hat{\mu}_i(t) + C_i(t)]$  are true  $(1 - \frac{2}{n^3})$ -confidence intervals of  $\mu_i$ .

We observe that if point  $i$  is picked by **Med-dit** less than  $n$  times at time  $t$ , then  $T_i(t)$  is equal to the number of times the point is picked. Further  $C_i(t)$  is the true  $(1 - \delta)$ -confidence interval from Eq (1).

However, if point  $i$  is picked for the  $n$ -th time at iteration  $t$  (line 7 of Algorithm 1) then the empirical mean is computed by evaluating all  $n - 1$  distances (many distances again). Hence  $T_i(t) = 2(n - 1)$ . As we know the mean distance of point  $i$  exactly,  $C_i(t) = 0$  is still the true confidence interval.

We remark that if a point  $i$  is picked to be updated the  $(n + 1)$ -th time, as  $C_i(t) = 0$ , we have that  $\forall j \neq i$ ,

$$\hat{\mu}_i(t) + C_i(t) = \hat{\mu}_i(t) - C_i(t) < \hat{\mu}_j(t) - C_j(t).$$

This gives us that the stopping criterion is satisfied and point  $i$  is declared as the medoid.

## 4 Extensions to the Theoretical Results

In this section we discuss two extensions to the theoretical results presented in the main article: 1. we can actually relax the sub-Gaussian condition to the condition that the random variables have finite variances while still having the same  $O(n \log n)$  sample complexity; 2. there exists a medoid algorithm with a  $O(n \log \log n)$  distance evaluations, which improves the sample complexity of `Med-dit` by a  $\log n$  factor and is essentially almost-linear.

In short, the sub-Gaussian condition can be weakened the condition that the random variables of sampling with replacement from  $\mathcal{D}_i$  have finite variances. This is by using some refined estimator to estimate the average distance rather than using the empirical mean [Bubeck et al., 2013].

The  $O(n \log \log n)$  sample complexity can be achieved by another best-arm algorithm called `exponential-gap` [Karnin et al., 2013]. This algorithm is  $\log n$  faster than `UCB-medoid`. But this improvement is at the sacrifice of a much larger constant factor.

### 4.1 Weakening the Sub-Gaussian Assumption

Careful readers may notice that in order to have the  $O(n \log n)$  sample complexity, `UCB-medoid` relies on a concentration bound where the tail probability decays exponentially. In the main article, this is achieved by assuming that for each point  $x_i$ , the random variable of sampling with replacement from  $\mathcal{D}_i$  is  $\sigma$ -sub-Gaussian. As a result, we can have the sub-Gaussian tail bound that for any point  $x_i$  at time  $t$ , with probability at least  $1 - \delta$ , the empirical mean  $\hat{\mu}_i$  satisfies

$$|\mu_i - \hat{\mu}_i| \leq \sqrt{\frac{2\sigma^2 \log \frac{2}{\delta}}{T_i(t)}}.$$

In fact, as pointed out by Bubeck et al. [2013], to achieve the  $O(n \log n)$  sample complexity, all we need is a performance guarantee like the one shown above for the empirical mean. To be more precise, we need the following property:

**Assumption 1.** [Bubeck et al., 2013] Let  $\epsilon \in (0, 1]$  be a positive parameter and let  $c, v$  be positive constants. Let  $X_1, \dots, X_T$  be i.i.d. random variables with finite mean  $\mu$ . Suppose that for all  $\delta \in (0, 1)$ , there exists an estimator  $\hat{\mu} = \hat{\mu}(T, \delta)$  such that, with probability at least  $1 - \delta$ ,

$$|\mu - \hat{\mu}| \leq v^{\frac{1}{1+\epsilon}} \left( \frac{c \log \frac{2}{\delta}}{T} \right)^{\frac{\epsilon}{1+\epsilon}}.$$

**Remark 2.** If the distribution of  $X_j$  satisfies  $\sigma$ -sub-Gaussian condition, then Assumption 1 is satisfied for  $\epsilon = 1$ ,  $c = 2$ , and variance factor  $v = \sigma^2$ .

However, Assumption 1 can be satisfied with conditions much weaker than the sub-Gaussian condition. One way is by substituting the empirical mean estimator by some refined mean estimator that gives the exponential tail bound. Specifically, as suggested by Bubeck et al. [2013], we can use Catoni's M estimator [Catoni et al., 2012].

Catoni's M estimator is defined as follows: let  $\psi : \mathbb{R} \rightarrow \mathbb{R}$  be a continuous strictly increasing function satisfying

$$-\log\left(1 - x + \frac{x^2}{2}\right) \leq \psi(x) \leq \log\left(1 + x + \frac{x^2}{2}\right).$$

Let  $\delta \in (0, 1)$  be such that  $T > 2 \log(\frac{1}{\delta})$  and introduce

$$\alpha_\delta = \sqrt{\frac{2 \log \frac{1}{\delta}}{T(\sigma^2 + \frac{2\sigma^2 \log \frac{1}{\delta}}{T - 2 \log \frac{1}{\delta}})}}.$$

If  $X_1, \dots, X_T$  are i.i.d. random variables, the Catoni's estimator is defined as the unique value  $\hat{\mu}_C = \hat{\mu}_C(T, \delta)$  such that

$$\sum_{i=1}^n \psi(\alpha_\delta(X_i - \hat{\mu}_C)) = 0.$$

Catoni [Catoni et al., 2012] proves that if  $T \geq 4 \log \frac{1}{\delta}$  and the  $X_j$  have mean  $\mu$  and variance at most  $\sigma^2$ , then with probability at least  $1 - \delta$ ,

$$|\hat{\mu}_C - \mu| \leq 2\sqrt{\frac{\sigma^2 \log \frac{2}{\delta}}{T}}. \quad (4)$$

The corresponding modification to **Med-dit** is as follows.

1. For the initialization step, sample each point  $4 \log \frac{1}{\delta}$  times to meet the condition for the concentration bound of the Catoni's M estimator.
2. For each arm  $i$ , if  $T_i(t) < n$ , maintain the  $1 - \delta$  confidence interval  $[\hat{\mu}_{C,i} - C_i(t), \hat{\mu}_{C,i} + C_i(t)]$ , where  $\hat{\mu}_{C,i}$  is the Catoni's estimator of  $\mu_i$ , and

$$C_i(t) = 2\sqrt{\frac{\sigma^2 \log \frac{2}{\delta}}{T_i(t)}}.$$

**Proposition 1.** For  $i \in [n]$ , let  $\Delta_i = \mu_i - \mu^*$ . If we pick  $\delta = \frac{1}{n^3}$  in the above algorithm, then with probability  $1 - o(1)$ , it returns the true medoid with the with number of distance evaluations  $M$  such that,

$$M \leq 12n \log n + \sum_{i \in [n]} \left( \frac{48\sigma^2}{\Delta_i^2} \log n \wedge 2n \right)$$

*Proof.* Let  $\delta = \frac{2}{n^3}$ . The initialization step takes an extra  $12n \log n$  distance computations. Following the same proof as Theorem 1, we can show that the modified algorithm returns the true medoid with probability at least  $1 - \Theta(\frac{1}{n})$ , and apart from the initialization, the total number of distance computations can be upper bounded by

$$\sum_{i \in [n]} \left( \frac{48\sigma^2}{\Delta_i^2} \log n \wedge 2n \right).$$

So the total number of distance computations can be upper bounded by

$$M \leq 12n \log n + \sum_{i \in [n]} \left( \frac{48\sigma^2}{\Delta_i^2} \log n \wedge 2n \right).$$

□

**Remark 3.** By using the Catoni's estimator, instead of the sub-Gaussian assumption, we only require a much weaker assumption that the distance evaluations have finite variance. Yet, we achieve the same order of the distance evaluation complexity.

## 4.2 On the $O(n \log \log n)$ Algorithm

The best-arm algorithm **exponential-gap** [Karnin et al., 2013] can be directly applied on the medoid problem, which takes  $O(\sum_{i \neq i^*} \Delta_i^{-2} \log \log \Delta_i^{-2})$  distance evaluations, essentially  $O(n \log \log n)$  if  $\Delta_i$  are constants. It is a variation of the family of action elimination algorithm for the best-arm problem. A typical action elimination algorithm proceeds as follows: Maintaining a set  $\Omega_k$  for  $k = 1, 2, \dots$ , initialized as  $\Omega_1 = [n]$ . Then it proceeds in epoches by sampling the arms in  $\Omega_k$  a predetermined number of times  $r_k$ , and maintains arms according to the rule:

$$\Omega_{k+1} = \{i \in \Omega_k : \hat{\mu}_a + C_a(t) < \hat{\mu}_i - C_i(t)\},$$

where  $a \in \Omega_k$  is a reference arm, e.g. the arm with the smallest  $\hat{\mu}_i + C_i(t)$ . Then the algorithm terminates when  $\Omega_k$  contains only one element.

The above vanilla version of the action elimination algorithm takes  $O(n \log n)$  distance evaluations, same as **Med-dit**. The improvement by **exponential-gap** is by observing that the suboptimal  $\log n$  factor is due to the large deviations of  $|\hat{\mu}_a - \mu_a|$  with  $a = \arg \min_{i \in \Omega_k} \hat{\mu}_i$ . Instead, **exponential-gap** use a subroutine **median elimination** [Even-Dar et al., 2006] to determine an alternative reference arm  $a$  with smaller deviations and allows for the removal of the  $\log n$  term, where **median elimination** takes  $O(\frac{n}{\epsilon^2} \log \frac{1}{\delta})$  distance evaluations to return a  $\epsilon$ -optimal arm. However, this will introduce a prohibitively large constant due to the use of **median elimination**. Regarding the technical details, we note both paper [Karnin et al., 2013, Even-Dar et al., 2006] assume the boundedness of the random variables for their proof, which is only used to have the hoeffding concentration bound. Therefore, with our sub-Gaussian assumption, the proof will follow symbol by symbol, line by line.
